# Supplementary material for: Upgrading of Biobased Glycerol to Glycerol Carbonate as a Tool to Reduce the CO2 Emissions of the Biodiesel Fuel Life Cycle
Source: MDPI journal article supplement (doi:10.3390/bioengineering9120778), 2022-12-06
Supplement: s1 [file s1]

Article

# Upgrading of Biobased Glycerol to Glycerol Carbonate as a Tool to Reduce the CO<sub>2</sub> Emissions of the Biodiesel Fuel Life Cycle

Biagio Anderlini <sup>1</sup>, Alberto Ughetti <sup>1</sup>, Emma Cristoni <sup>1</sup>, Luca Forti <sup>2</sup>, Luca Rigamonti <sup>1,3,4</sup> and Fabrizio Roncaglia <sup>1,3,4,\*</sup>

<sup>1</sup> Department of Chemical and Geological Sciences, University of Modena and Reggio Emilia, Via G. Campi 103, 41125 Modena, Italy

<sup>2</sup> Department of Life Sciences, University of Modena and Reggio Emilia, Via G. Campi 103, 41125 Modena, Italy

<sup>3</sup> Interdepartmental Centre H<sub>2</sub>-MORE, University of Modena and Reggio Emilia, Via Università 4, 41121 Modena, Italy

<sup>4</sup> INSTM Research Unit of Modena, Via G. Campi 103, 41125 Modena, Italy

\* Correspondence: fabrizio.roncaglia@unimore.it

**Citation:** Anderlini, B.; Ughetti, A.; Cristoni, E.; Forti, L.; Rigamonti, L.; Roncaglia, F. Upgrading of Biobased Glycerol to Glycerol Carbonate as a Tool to Reduce the CO<sub>2</sub> Emissions of the Biodiesel Fuel Life Cycle. *Bioengineering* **2022**, *9*, 778. <https://doi.org/10.3390/bioengineering9120778>

Academic Editors: Indra Neel Pulidindi, Aharon Gedanken, Giorgos Markou

Received: 7 November 2022

Accepted: 25 November 2022

Published: 6 December 2022

**Publisher's Note:** MDPI stays neutral with regard to jurisdictional claims in published maps and institutional affiliations.

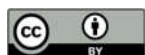

**Copyright:** © 2022 by the authors. Licensee MDPI, Basel, Switzerland. This article is an open access article distributed under the terms and conditions of the Creative Commons Attribution (CC BY) license (<https://creativecommons.org/licenses/by/4.0/>).

## SUPPLEMENTARY

### Products characterization.

After preliminary evaluation, Gly-urea mixtures were processed within the DoE domain, that is: reactor temperature from 175 to 195 °C, recirculation time from 90 to 210 min, urea:Gly MR from 1.2 to 1.8. After solvent extraction (EtOAc:Et<sub>2</sub>O 4:1) and drying, a colorless oil was obtained. This raw material was directly analyzed with <sup>1</sup>H NMR spectroscopy and two main groups of signals were detected:

- a set of signals (Figure S1) was assigned to GC;

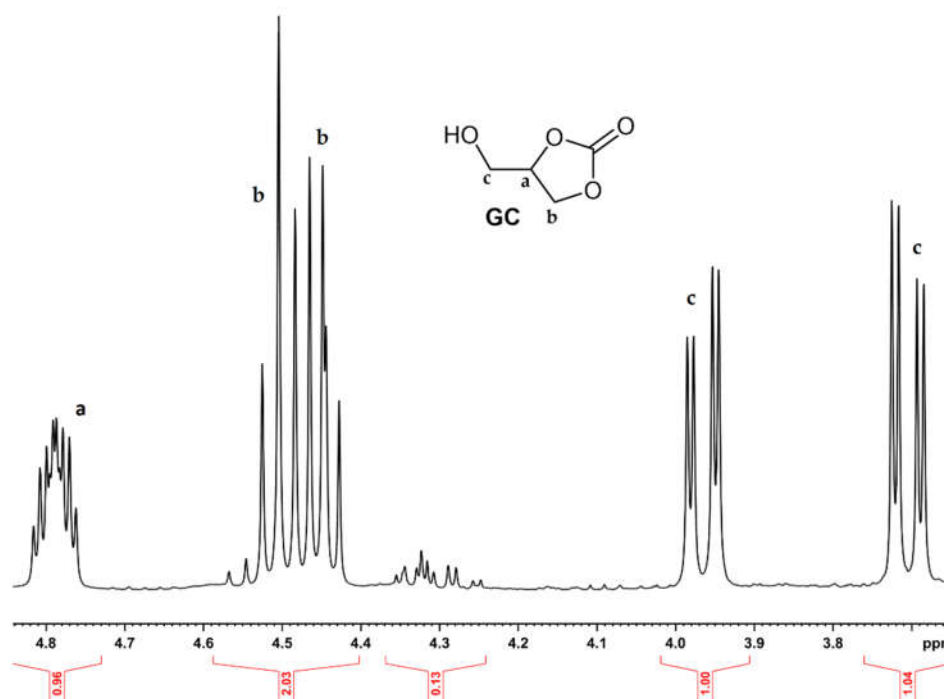

**Figure S1.** Typical  $^1\text{H}$ -NMR spectra ( $\text{CDCl}_3$ , 400 MHz) of a GC-rich raw mixture.

- a second set of signals was assigned to DGTC. DGTC was always detected as contaminant of the main product (GC) and its identity was gathered from the literature [94-96]. In Figure S2 is shown a typical  $^1\text{H}$  NMR spectra of a DGTC-rich raw mixture.

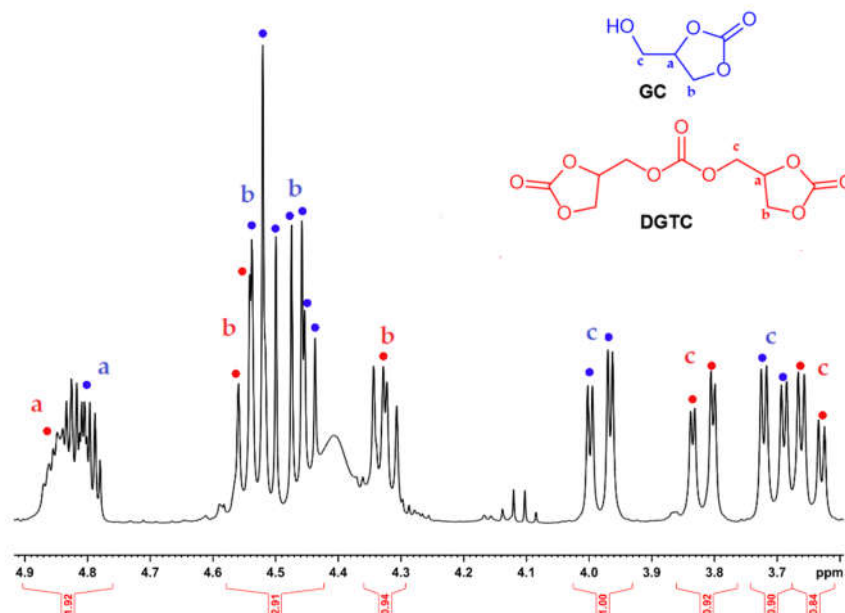

**Figure S2.** Typical  $^1\text{H}$  NMR spectra ( $\text{CDCl}_3$ , 400 MHz) of a DGTC-rich raw mixture.

As DGTC was the only recurring and largely predominant detected side-product, we approximated the raw (extracted) reaction mixture as a binary mixture. Given that, GC molar selectivity was calculated from the integrated area of isolated  $-\text{CH}-\text{CH}_2-\text{OH}$  signals (c in Figg S1 and S2) of the desired product (GC, dd at  $\delta$  3.99 ppm, 1H) and the contaminant (DGTC, dd at  $\delta$  3.82 ppm, 2H), as follows:

$$\text{GC Sel \%} = \frac{100 \cdot \text{Area} (\delta 3.99 \text{ ppm})}{\text{Area} (\delta 3.99 \text{ ppm}) + (\text{Area} (\delta 3.82 \text{ ppm}) / 2)}$$

Figure S2 depicts the  $^1\text{H}$  NMR spectra of the raw mixture obtained after solvent extraction from experiment n. 3 (Table 2). In this case, the calculated value for GC selectivity% equals to 68 ( $= 100 \cdot (1.00 / 1.00 + (0.92 / 2))$ ).
